# Supplementary material for: Epitope similarity cannot explain the pre-formed T cell immunity towards structural SARS-CoV-2 proteins
Source: PubMed Central journal article supplement (PMC7642385; doi:10.1038/s41598-020-75972-z), 2020-11-04
Supplement: 41598_2020_75972_MOESM1_ESM.pdf [file 41598_2020_75972_MOESM1_ESM.pdf]

# Supplement to

# Epitope similarity cannot explain the

# pre-formed T cell immunity towards

# structural SARS-CoV-2 proteins

Ulrik Stervbo<sup>1,2\*</sup>, Sven Rahmann<sup>3\*</sup>, Toralf Roch<sup>1,2</sup>, Timm H. Westhoff<sup>1</sup>, Nina Babel<sup>1,2</sup>

<sup>1</sup> Center for Translational Medicine, University Hospital Marien Hospital Herne, Ruhr-University Bochum, Germany

<sup>2</sup> Berlin-Brandenburg Center for Regenerative Therapies, and Institute of Medical Immunology, Charité – Universitätsmedizin Berlin, Corporate Member of Freie Universität Berlin, Humboldt-Universität zu Berlin, and Berlin Institute of Health, Berlin, Germany

<sup>3</sup> Genome Informatics, Institute of Human Genetics, University of Duisburg-Essen, Germany

\* Equal contribution

Contact:

Ulrik Stervbo: [ulrik.stervbo@elisabethgruppe.de](mailto:ulrik.stervbo@elisabethgruppe.de)

Sven Rahmann: [sven.rahmann@uni-due.de](mailto:sven.rahmann@uni-due.de)

# Content

|                                                                                                                                 |    |
|---------------------------------------------------------------------------------------------------------------------------------|----|
| Content.....                                                                                                                    | 2  |
| Supplementary Methods .....                                                                                                     | 3  |
| Workflow and Software .....                                                                                                     | 3  |
| Supplementary Tables.....                                                                                                       | 4  |
| Supplementary Table 1: SARS-CoV-2 proteins.....                                                                                 | 4  |
| Supplementary Table 2: Selected viruses.....                                                                                    | 5  |
| Supplementary Table 3. Selected fungi .....                                                                                     | 7  |
| Supplementary Table 4. Selected bacteria .....                                                                                  | 8  |
| Supplementary Table 5. Selected parasites .....                                                                                 | 9  |
| Supplement Table 6. Used HLA-I molecules.....                                                                                   | 9  |
| Supplementary Table 7. Used HLA-II molecules .....                                                                              | 10 |
| Supplementary Figures.....                                                                                                      | 11 |
| Supplementary Figure 1: Pathogen relevance score for HLA-I SARS-CoV-2 epitopes.....                                             | 11 |
| Supplementary Figure 2: Pathogen relevance score for HLA-II SARS-CoV-2 epitopes .....                                           | 12 |
| Supplementary Figure 3: Edit distance between HLA-A SARS-CoV-2 epitopes and epitopes in<br>selected pathogen.....               | 13 |
| Supplementary Figure 4: Edit distance between HLA-B SARS-CoV-2 epitopes and epitopes in<br>selected pathogen.....               | 14 |
| Supplementary Figure 5: Edit distance between HLA-C SARS-CoV-2 epitopes and epitopes in<br>selected pathogen.....               | 15 |
| Supplementary Figure 6: Number of known epitopes SARS-CoV-1 shared with predicted<br>SARS-CoV-2 epitopes.....                   | 16 |
| Supplementary Figure 7: Number of HLA-I and HLA-II presented epitopes in each SARS-CoV-2<br>protein.....                        | 17 |
| Supplementary Figure 8: Number of different epitopes presenting HLAs identified for epitope<br>in each SARS-CoV-2 protein. .... | 18 |
| References .....                                                                                                                | 19 |

# Supplementary Methods

## Workflow and Software

Our workflow is available as a Snakefile for use with Snakemake<sup>1</sup>, starting with the download of the "nr" database from NCBI, at gitlab at the URL <https://gitlab.com/svenrahmann/corona>. The following steps are included, each performed by a specific Python script contained in the above repository.

Required inputs to the workflow are:

- a FASTA file with SARS-CoV-2 protein sequences (sars-cov2.fa),
- a tab-separated file with selected taxIDs of species to consider (species\_taxid.tsv),
- a text file with predicted epitopes of SARS-CoV-2 (sars\_mhci\_peptides.txt, sars\_mhcii\_peptides.txt; one peptide per line)

All of these are provided in the repository.

The workflow consists of the following steps.

1. Download of the NCBI nr database: Snakefile (rule get\_nr)
2. Extract protein sequences of common human pathogens from nr: Snakefile (rule select\_species); filterspecies.py
3. Compute statistics on the number of sequences of each selected pathogen present in the nr database: Snakefile (rule count\_selected)
4. Extract k-mers from each species' protein sequences for several values of k and for several reduced alphabets: Snakefile (rule get\_kmers); getcounters.py
5. Filter out k-mers that only occur once in the set of all proteins of a species for different k, alphabets and filter thresholds: Snakefile (rule filter\_kmers); filterkmers.py
6. Create a table of SARS-CoV-2 epitopes by protein with k-mer matches against pathogens. The resulting output files (results/epitopes\_{class}\_{k}\_{alphabet}\_{filterthreshold}) have a tab-separated tabular format with 3 columns: (SARS-CoV-2 protein name, pathogen name, peptide sequence of matched SARS-CoV-2 epitope). After all epitopes matched by the same pathogen have been shown, a statistics line (starting with '#') is inserted, giving the pathogen relevance score and other statistical information. At the end of the file, several summary statistics (over all proteins, per pathogen) are given (lines starting with '+'), including overall pathogen relevance scores. The same information is also written into a summary file: Snakefile (rules show\_epitopes; summarize\_epitopes); showepitopes.py.
7. Compute average pathogen ranks from different values of k and filter thresholds, for each epitope class I and II separately and combined, and generate plots of ranked ranks: Snakefile (rule aggregate\_results); aggregate.py

# Supplementary Tables

## Supplementary Table 1: SARS-CoV-2 proteins

Name and function of the SARS-CoV2 proteins obtained from ViralZone<sup>2</sup>.

| <b>UniProt ID</b> | <b>Common name</b>                  |
|-------------------|-------------------------------------|
| P0DTC1            | Replicase polyprotein 1a (pp1a)     |
| P0DTD1            | Replicase polyprotein 1ab (pp1ab)   |
| P0DTC2            | Spike glycoprotein (S)              |
| P0DTC3            | ORF3a protein (NS3a)                |
| P0DTC4            | Envelope small membrane protein (E) |
| P0DTC5            | Membrane protein (M)                |
| P0DTC6            | ORF6 protein                        |
| P0DTC7            | ORF7a protein                       |
| P0DTD8            | ORF7b protein                       |
| P0DTC8            | ORF8 protein                        |
| P0DTC9            | Nucleoprotein (N)                   |
| P0DTD2            | ORF9b protein                       |
| P0DTD3            | ORF14 protein                       |

## Supplementary Table 2: Selected viruses

Names and taxIDs obtained from the NCBI Taxonomy database<sup>3</sup>.

| <b>Family</b>              | <b>Scientific name</b>   | <b>TaxID</b> | <b>Taxon level</b> |
|----------------------------|--------------------------|--------------|--------------------|
| <b>ssRNA(+)</b>            |                          |              |                    |
| Caliciviridae              | Norwalk virus            | 11983        | Species            |
| Coronaviridae              | Human coronavirus OC43   | 31631        | Species            |
|                            | Human coronavirus HKU1   | 290028       | Species            |
|                            | Human coronavirus 229E   | 11137        | Species            |
|                            | Human coronavirus NL63   | 277944       | Species            |
| Matonaviridae              | Rubella virus            | 11041        | Species            |
| Picornaviridae             | Human rhinovirus A*      | 147711       | Species            |
|                            | Human rhinovirus B*      | 147712       | Species            |
|                            | Human rhinovirus C*      | 463676       | Species            |
|                            | Enterovirus B            | 138949       | Species            |
|                            | Human hepatitis A virus  | 208726       | Subtype            |
|                            | Hepatitis B virus        | 10407        | Species            |
|                            | Hepatitis E virus        | 12461        | no rank            |
|                            | Hepacivirus C            | 11103        | Species            |
|                            | Human poliovirus 1       | 12080        | Subtype            |
|                            | Human poliovirus 2       | 12083        | Subtype            |
| Human poliovirus 3         | 12086                    | Subtype      |                    |
| <b>ssRNA(-)</b>            |                          |              |                    |
| Orthomyxoviridae           | Influenza A virus        | 11320        | Species            |
|                            | Influenza B virus        | 11520        | Species            |
| Paramyxoviridae            | Human respirovirus 1     | 12730        | Species            |
|                            | Human respirovirus 3     | 11216        | Species            |
|                            | Human rubulavirus 2      | 1979160      | Species            |
|                            | Human rubulavirus 4      | 1979161      | Species            |
|                            | Mumps rubulavirus        | 1979165      | Species            |
|                            | Measles morbillivirus    | 11234        | Species            |
| Pneumoviridae              | Human metapneumovirus    | 162145       | Species            |
| <b>dsRNA</b>               |                          |              |                    |
| Reoviridae                 | Rotavirus A              | 28875        | Species            |
| <b>dsDNA</b>               |                          |              |                    |
| Herpesviridae <sup>1</sup> | Human alphaherpesvirus 1 | 10298        | Species            |
|                            | Human alphaherpesvirus 3 | 10335        | Species            |
|                            | Human gammaherpesvirus 4 | 10376        | Species            |

|                  |                         |       |         |
|------------------|-------------------------|-------|---------|
|                  | Human betaherpesvirus 5 | 10359 | Species |
| Papillomaviridae | Human papillomavirus    | 10566 | Species |

---

\*Subspecies were included by necessity.

<sup>1</sup>Common names: Human alphaherpesvirus 1: Herpes simplex virus type 1; Human alphaherpesvirus 3: Varicella-zoster virus; Human gammaherpesvirus 4: Epstein-Barr virus; Human betaherpesvirus 5: Human cytomegalovirus

## Supplementary Table 3. Selected fungi

Names and taxIDs obtained from the NCBI Taxonomy database<sup>3</sup>.

| <b>Genus</b>  | <b>Scientific name</b>      | <b>TaxID</b> | <b>Taxon level</b> |
|---------------|-----------------------------|--------------|--------------------|
| <b>Yeast</b>  |                             |              |                    |
| Candida       | Candida albicans            | 5476         | Species            |
|               | Candida glabrata            | 5478         | Species            |
|               | Candida tropicalis          | 5482         | Species            |
| <b>Fungus</b> |                             |              |                    |
| Aspergillus   | Aspergillus fumigatus       | 746128       | Species            |
|               | Aspergillus flavus          | 5059         | Species            |
|               | Aspergillus niger           | 5061         | Species            |
| Cryptococcus  | Cryptococcus neoformans     | 5207         | Species            |
| Pneumocystis  | Pneumocystis jirovecii      | 42068        | Species            |
| Stachybotrys  | Stachybotrys chartarum*     | 74722        | Species            |
| Trichophyton  | Trichophyton rubrum         | 5551         | Species            |
|               | Trichophyton mentagrophytes | 523103       | Species            |

\*Subspecies were included by necessity

## Supplementary Table 4. Selected bacteria

Names and taxIDs obtained from the NCBI Taxonomy database<sup>3</sup>.

| Genus                | Scientific name                                         | TaxID  | Taxon level |
|----------------------|---------------------------------------------------------|--------|-------------|
| <b>Atypical</b>      |                                                         |        |             |
| Mycoplasma           | Mycoplasma pneumoniae                                   | 2104   | Species     |
|                      | Mycoplasma genitalium                                   | 2097   | Species     |
| <b>Gram-negative</b> |                                                         |        |             |
| Bordetella           | Bordetella pertussis                                    | 520    | Species     |
| Burkholderia         | Burkholderia cepacia                                    | 292    | Species     |
| Campylobacter        | Campylobacter jejuni                                    | 197    | Species     |
| Chlamydia            | Chlamydia trachomatis                                   | 813    | Species     |
| Escherichia          | Escherichia coli                                        | 562    | Species     |
| Haemophilus          | Haemophilus influenzae                                  | 727    | Species     |
| Klebsiella           | Klebsiella pneumoniae                                   | 573    | Species     |
| Legionella           | Legionella pneumophila                                  | 446    | Species     |
| Neisseria            | Neisseria gonorrhoeae                                   | 485    | Species     |
| Proteus              | Proteus mirabilis                                       | 584    | Species     |
| Pseudomonas          | Pseudomonas aeruginosa                                  | 287    | Species     |
| Salmonella           | Salmonella enterica subsp. enterica serovar Typhimurium | 90371  | Serovar     |
|                      | Salmonella enterica subsp. enterica serovar Enteritidis | 149539 | Serovar     |
| Shigella             | Shigella flexneri                                       | 623    | Species     |
|                      | Shigella boydii                                         | 621    | Species     |
|                      | Shigella dysenteriae*                                   | 622    | Species     |
| <b>Gram-positive</b> |                                                         |        |             |
| Bacillus             | Bacillus cereus                                         | 1396   | Species     |
| Clostridium          | Clostridium tetani                                      | 1513   | Species     |
|                      | Clostridium difficile*                                  | 1496   | Species     |
| Corynebacterium      | Corynebacterium diphtheriae                             | 1717   | Species     |
| Staphylococcus       | Staphylococcus aureus                                   | 1280   | Species     |
|                      | Staphylococcus epidermidis                              | 1282   | Species     |
| Streptococcus        | Streptococcus pneumoniae                                | 1313   | Species     |
|                      | Streptococcus pyogenes                                  | 1314   | Species     |

\*Subspecies were included by necessity



## Supplementary Table 5. Selected parasites

Names and taxIDs obtained from the NCBI Taxonomy database<sup>3</sup>.

| Genus            | Scientific name       | TaxID | Taxon level |
|------------------|-----------------------|-------|-------------|
| <b>Parasites</b> |                       |       |             |
| Trichinella      | Trichinella spiralis  | 6334  | Species     |
| Trichomonas      | Trichomonas vaginalis | 5722  | Species     |

## Supplement Table 6. Used HLA-I molecules

Allele frequencies for Europe were obtained from the Allele Frequency Net Database<sup>4</sup>.

| Locus    | Allele  | % individuals with allele |
|----------|---------|---------------------------|
| <b>A</b> |         |                           |
|          | A*02:01 | 15.08                     |
|          | A*01:01 | 10.28                     |
|          | A*03:01 | 8.68                      |
|          | A*24:02 | 6.14                      |
|          | A*11:02 | 3.80                      |
| <b>B</b> |         |                           |
|          | B*08:01 | 6.77                      |
|          | B*07:02 | 6.02                      |
|          | B*44:02 | 5.48                      |
|          | B*51:01 | 4.89                      |
|          | B*35:01 | 4.73                      |
| <b>C</b> |         |                           |
|          | C*07:01 | 11.58                     |
|          | C*07:02 | 8.21                      |
|          | C*04:01 | 7.80                      |
|          | C*05:01 | 6.09                      |
|          | C*06:02 | 5.46                      |

## Supplementary Table 7. Used HLA-II molecules

Allele frequencies for Europe were obtained from the Allele Frequency Net Database<sup>4</sup>.

| <b>Locus</b> | <b>Allele</b> | <b>% individuals with allele</b> |
|--------------|---------------|----------------------------------|
| <b>DPA1</b>  |               |                                  |
|              | DPA1*01:03    | 19.40                            |
|              | DPA1*02:01    | 6.60                             |
|              | DPA1*02:02    | 1.04                             |
|              | DPA1*04:01    | 0.60                             |
|              | DPA1*01:04    | 0.50                             |
| <b>DPB1</b>  |               |                                  |
|              | DPB1*04:01    | 27.63                            |
|              | DPB1*02:01    | 13.17                            |
|              | DPB1*04:02    | 10.19                            |
|              | DPB1*03:01    | 7.60                             |
|              | DPB1*107:01   | 6.50                             |
| <b>DQA1</b>  |               |                                  |
|              | DQA1*05:05    | 25.51                            |
|              | DQA1*05:01    | 12.92                            |
|              | DQA1*01:02    | 10.91                            |
|              | DQA1*03:01    | 8.25                             |
|              | DQA1*02:01    | 6.61                             |
| <b>DQB1</b>  |               |                                  |
|              | DQB1*03:01    | 12.81                            |
|              | DQB1*02:01    | 9.67                             |
|              | DQB1*05:01    | 6.50                             |
|              | DQB1*06:02    | 6.17                             |
|              | DQB1*02:02    | 5.71                             |
| <b>DRB1</b>  |               |                                  |
|              | DRB1*15:01    | 6.67                             |
|              | DRB1*07:01    | 6.65                             |
|              | DRB1*03:01    | 6.25                             |
|              | DRB1*11:01    | 4.46                             |
|              | DRB1*01:01    | 4.31                             |

# Supplementary Figures

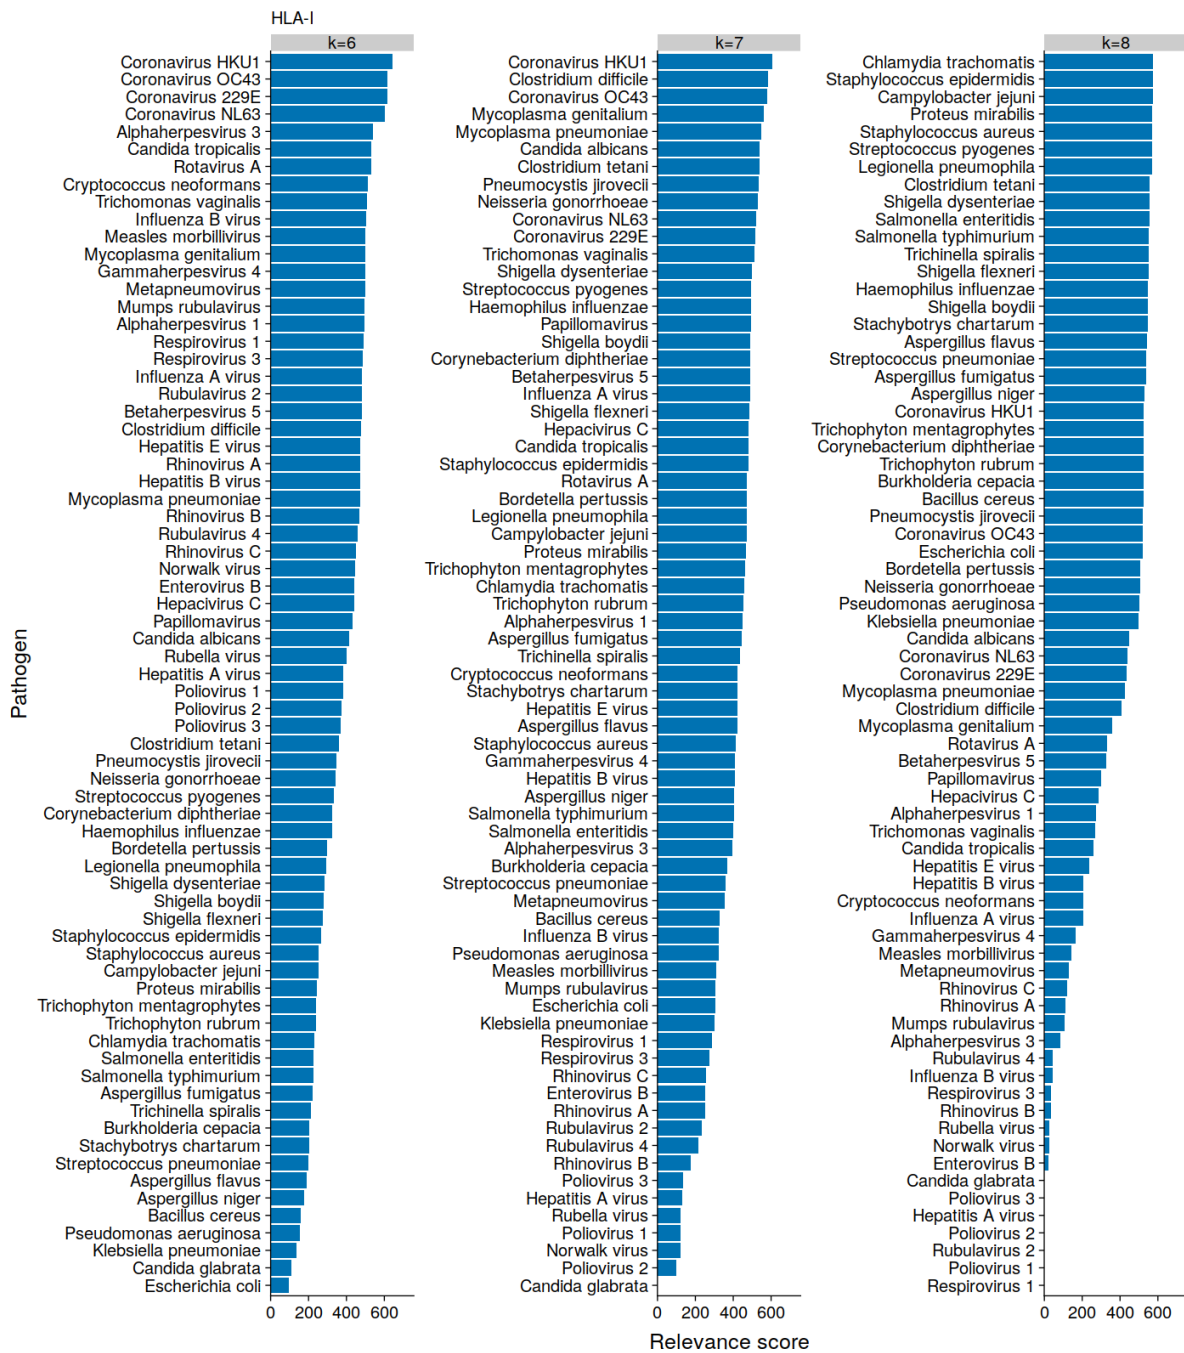

Supplementary Figure 1: Pathogen relevance score for HLA-I SARS-CoV-2 epitopes

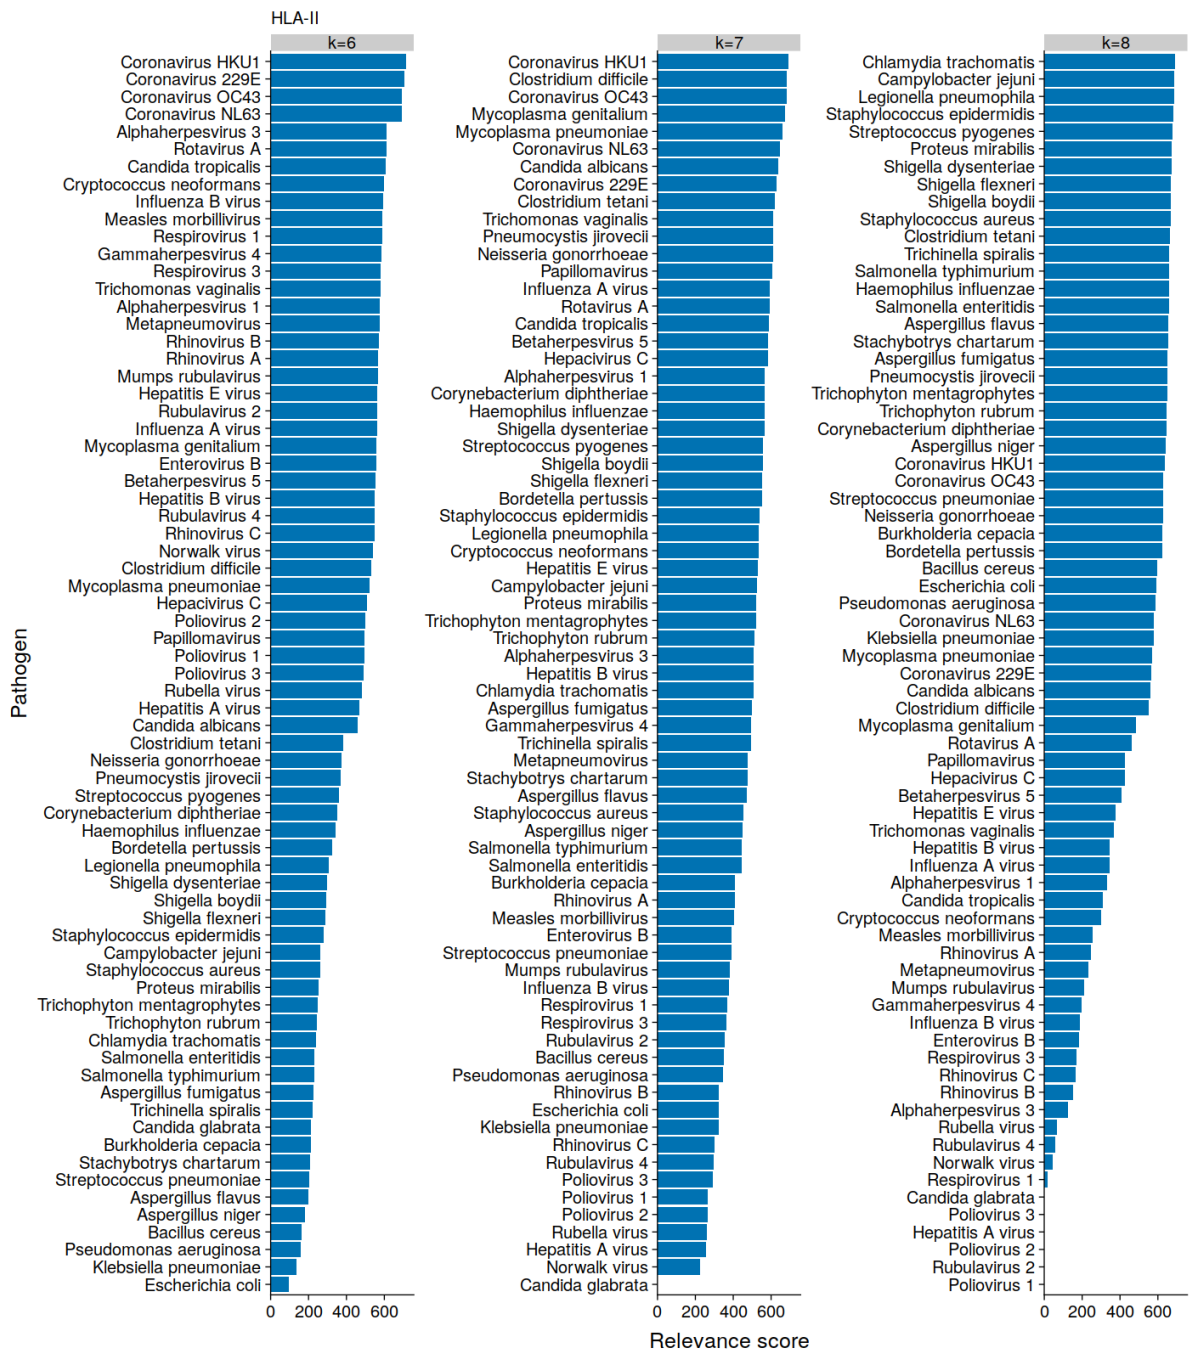

Supplementary Figure 2: Pathogen relevance score for HLA-II SARS-CoV-2 epitopes

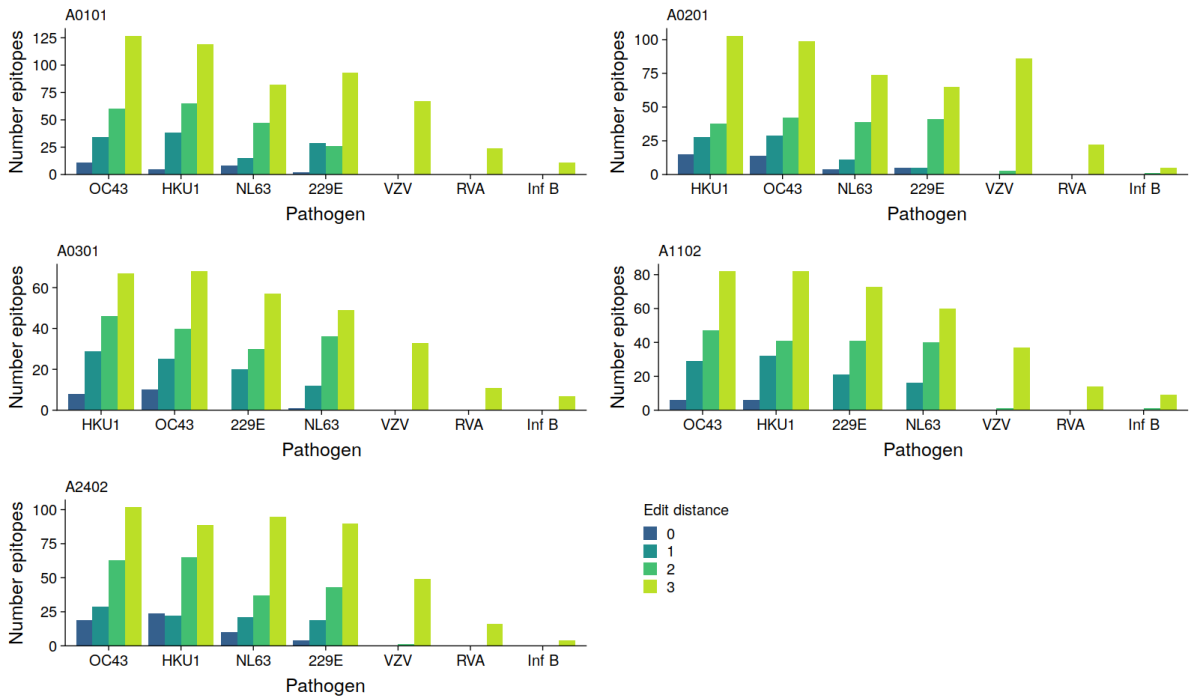

Supplementary Figure 3: Edit distance between HLA-A SARS-CoV-2 epitopes and epitopes in selected pathogen

The Levenshtein distance is here taken as the edit distance.

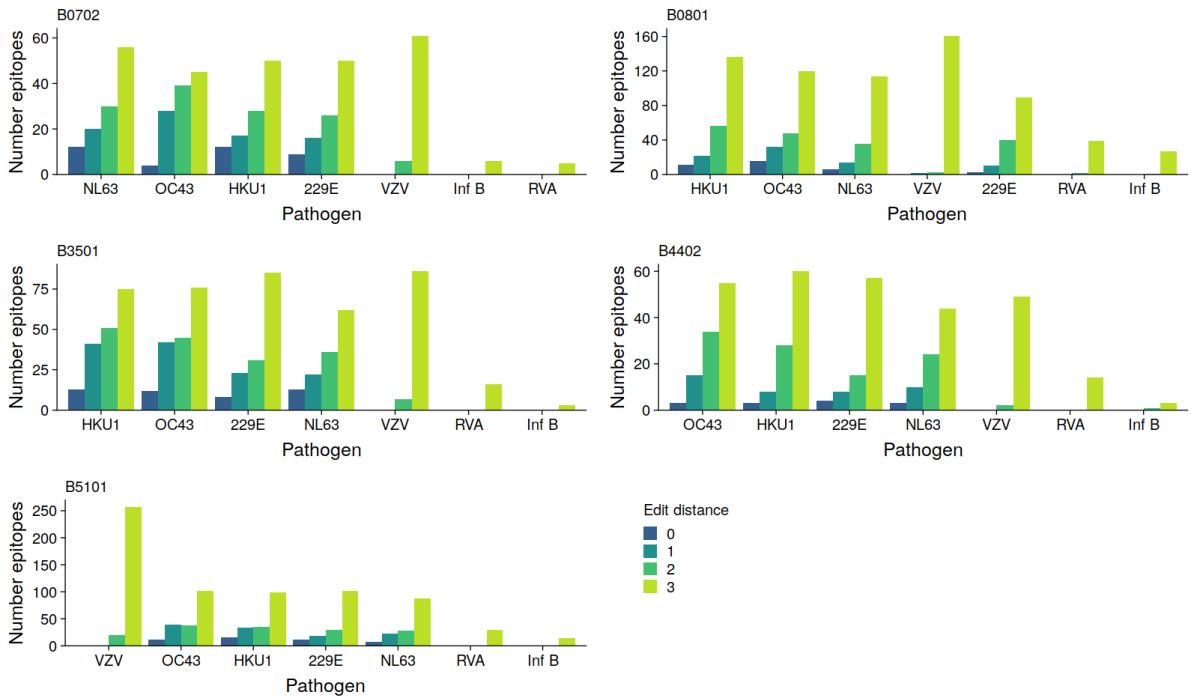

Supplementary Figure 4: Edit distance between HLA-B SARS-CoV-2 epitopes and epitopes in selected pathogen

The Levenshtein distance is here taken as the edit distance.

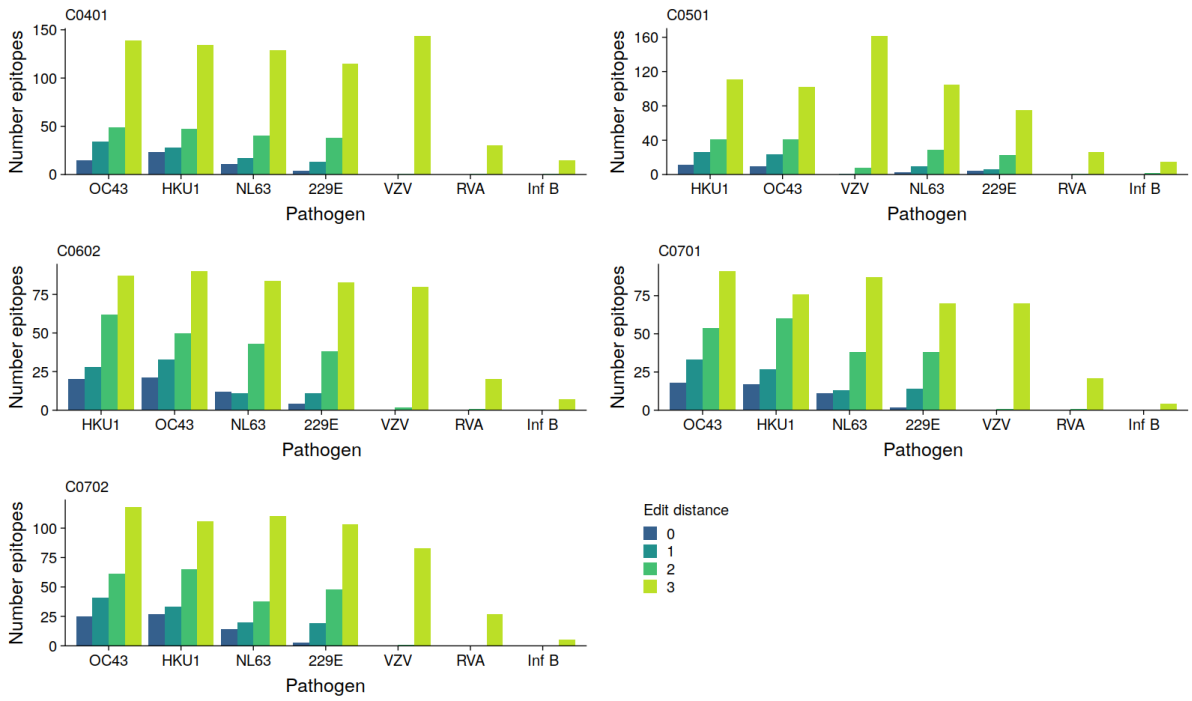

Supplementary Figure 5: Edit distance between HLA-C SARS-CoV-2 epitopes and epitopes in selected pathogen

The Levenshtein distance is here taken as the edit distance.

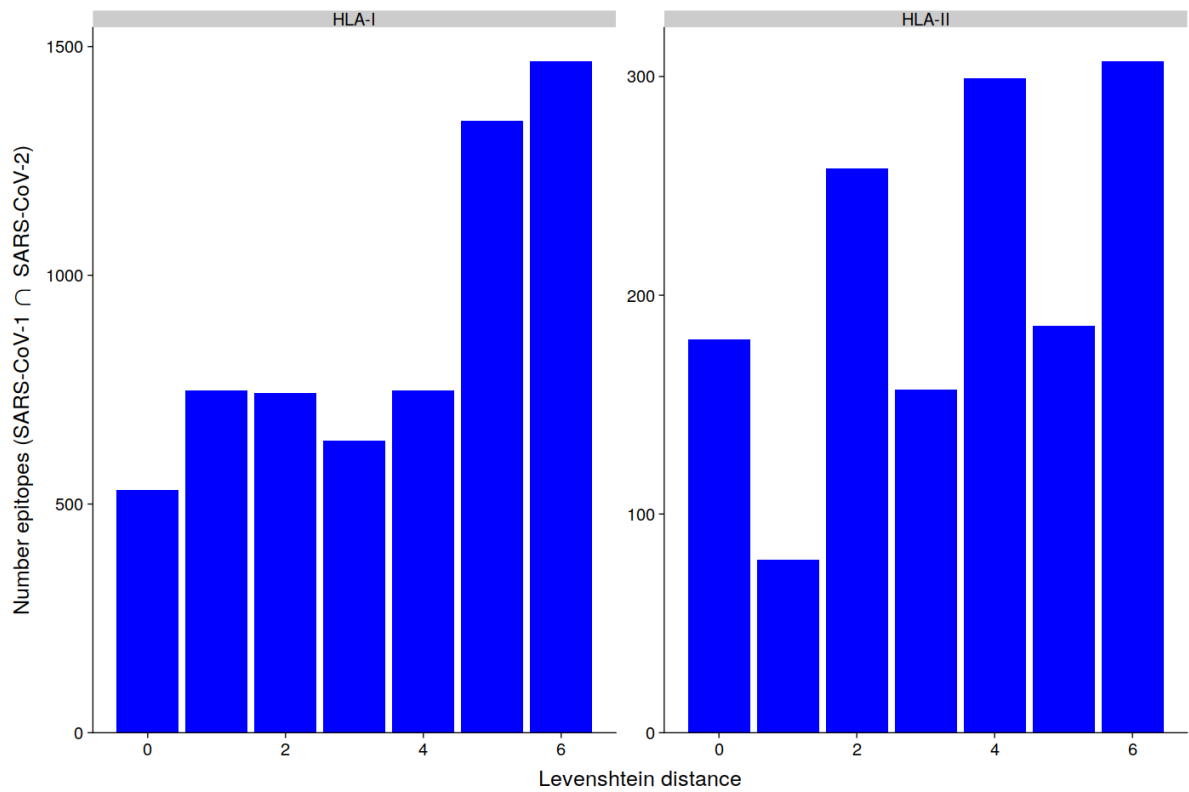

**Supplementary Figure 6: Number of known epitopes SARS-CoV-1 shared with predicted SARS-CoV-2 epitopes.**

The known SARS-CoV-1 were obtained from [iedb.org](http://iedb.org) and compared to the predicted SARS-CoV-2 epitopes using the edit distance. The Levenshtein distance is here taken as the edit distance.



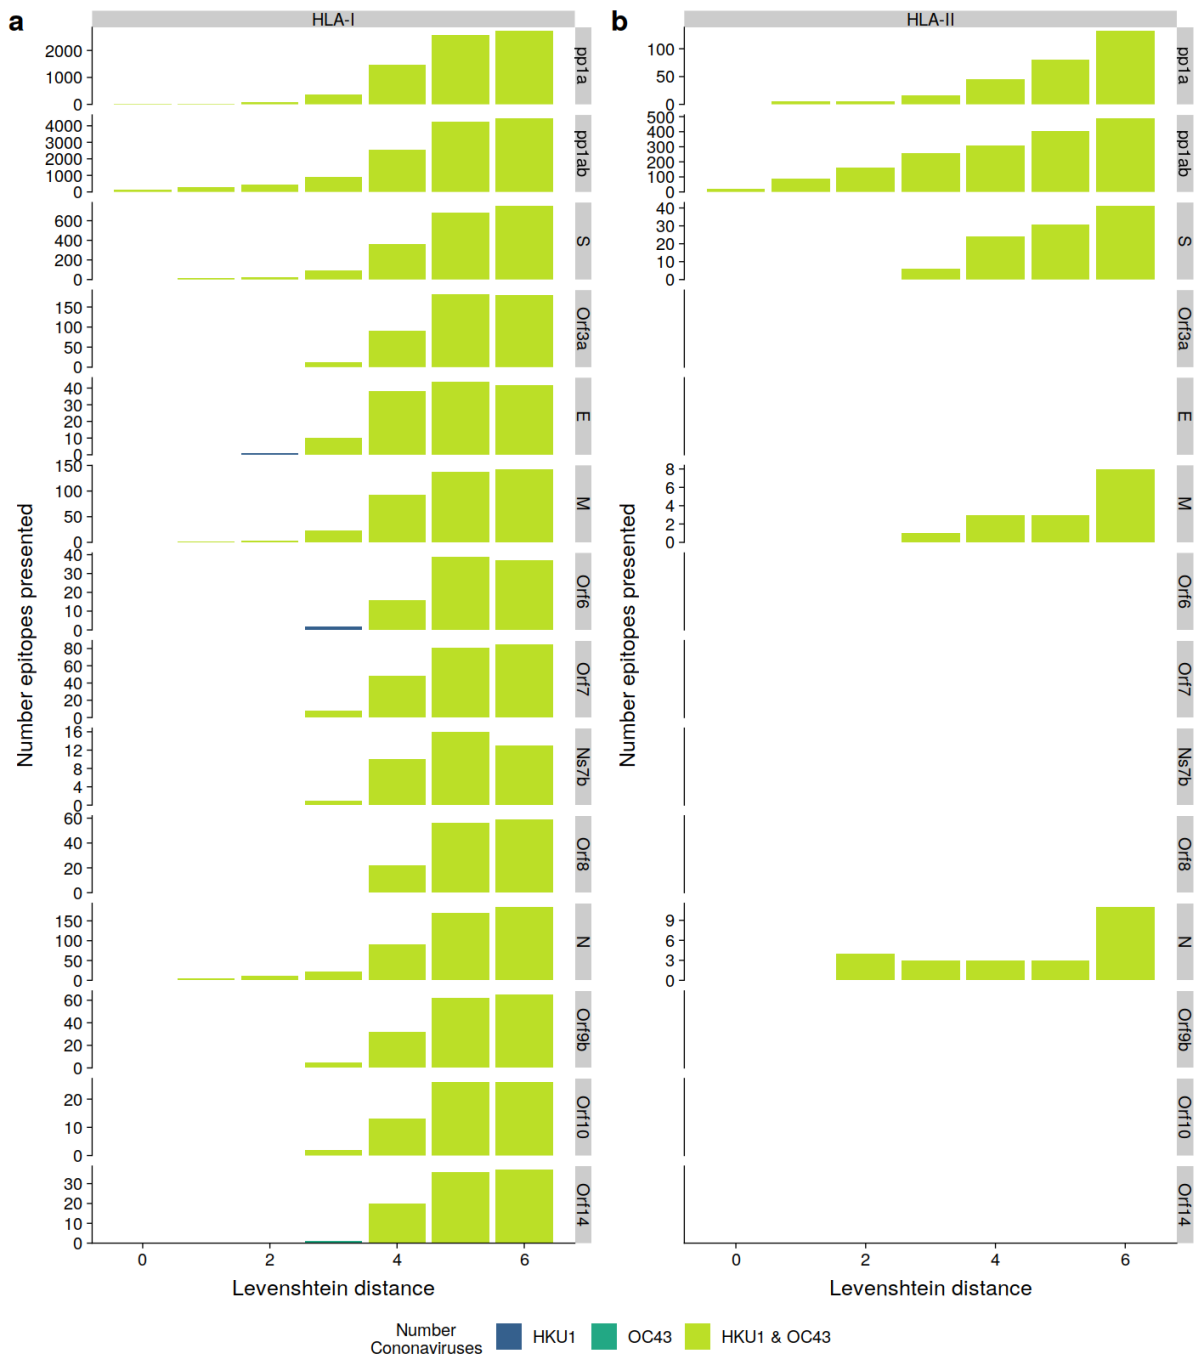

### Supplementary Figure 7: Number of HLA-I and HLA-II presented epitopes in each SARS-CoV-2 protein

The number of SARS-CoV-2 epitopes are compared to the epitopes predicted in HKU1 and OC43 using the edit distance. Only HLA-II presented epitopes from pp1a, pp1ab, S, M, and N proteins had an edit distance of 6 or less. The Levenshtein distance is here taken as the edit distance.

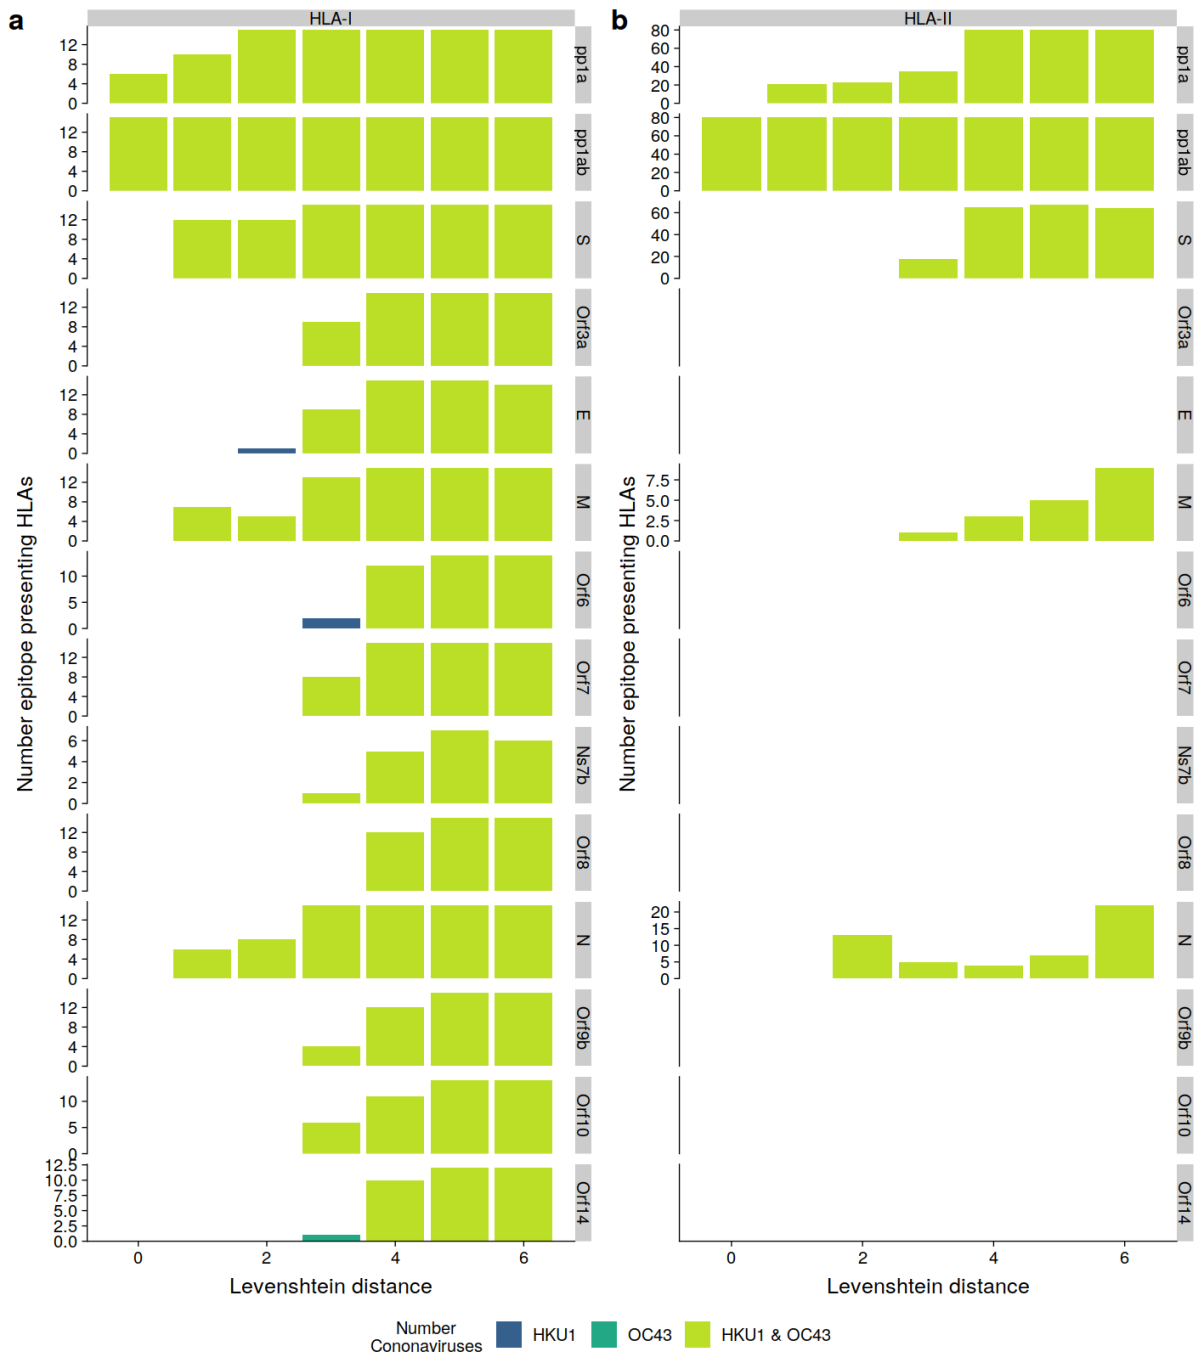

### Supplementary Figure 8: Number of different epitopes presenting HLAs identified for epitope in each SARS-CoV-2 protein.

The highest number of possible HLAs are 15 for HLA-I and 80 for HLA-II (50 DPA1-DPB1 combinations, 25 DQA1-DQB1 combinations, and 5 DRB1). Only HLA-II presented epitopes from pp1a, pp1ab, S, M, and N proteins had a edit distance of 6 or less. The Levenshtein distance is here taken as the edit distance.

# References

1. Koster, J. & Rahmann, S. Snakemake--a scalable bioinformatics workflow engine. *Bioinformatics* **28**, 2520–2522 (2012).
2. Hulo, C. *et al.* ViralZone: a knowledge resource to understand virus diversity. *Nucleic Acids Res.* **39**, D576–D582 (2011).
3. Federhen, S. The NCBI Taxonomy database. *Nucleic Acids Res.* **40**, D136–D143 (2012).
4. Gonzalez-Galarza, F. F. *et al.* Allele frequency net database (AFND) 2020 update: gold-standard data classification, open access genotype data and new query tools. *Nucleic Acids Res.* **48**, D783–D788 (2020).
